# Supplementary material for: Main Human Urinary Metabolites after Genipap (Genipa americana L.) Juice Intake
Source: PubMed Central journal article supplement (PMC6165415; doi:10.3390/nu10091155), 2018-08-24

## Supporting Information

**Table S1:** Physical chemical analysis in genipap pulp.

| Physical chemical parameters                  | Mean and standard deviation |
|-----------------------------------------------|-----------------------------|
| Ash (%)                                       | 3.26 ± 0.17                 |
| Titrateable acidity (g Eq. citric acid/100 g) | 0.85 ± 0.26                 |
| pH                                            | 3.95 ± 0.14                 |
| Moisture (%)                                  | 77.32 ± 0.60                |
| Total soluble solids (°BRIX)                  | 20.32 ± 0.58                |
| Total phenolics (mg Eq. galic acid/g)         | 91.71 ± 3.10                |
| ORAC <sup>a</sup> (μmol Eq. Trolox/100 g)     | 6.71 ± 0.82                 |
| Total flavanols (mg Eq. catechin/g)           | 0.03 ± 0.00                 |
| Total flavonols (mg Eq. rutin/kg)             | 0.54 ± 0.12                 |
| Ascorbic acid mg/100 g                        | 0.19 ± 0.06                 |
| Carbohydrates (%)                             | 9.16 ± 2.64                 |
| Fiber (%)                                     | 7.73 ± 1.88                 |
| Proteins (%)                                  | 2.04 ± 1.09                 |
| Lipides (%)                                   | 0.67 ± 0.15                 |

<sup>a</sup> Oxygen radical absorbance capacity

**Table S2.** 50 (P-value < 0.05) most discriminant features in positive mode.

| Annotated metabolite                                          | MS Main ions<br><i>m/z</i> ( <i>p</i> -value<br>classification)                                   | Ion                                                                                                                | RT<br>(min) | Proposed<br>precursor ion<br>formula            | Mass<br>precision<br>(ppm) | MS/MS ( <i>m/z</i> )<br>main fragments<br>(30-40 v)                                         | Reference/<br>identification level                    |
|---------------------------------------------------------------|---------------------------------------------------------------------------------------------------|--------------------------------------------------------------------------------------------------------------------|-------------|-------------------------------------------------|----------------------------|---------------------------------------------------------------------------------------------|-------------------------------------------------------|
| Genipin isomer                                                | 227.0911 (16)<br>209.0807 (1)<br>165.0909 (4)<br>163.0751 (14)<br>149.0596 (5)                    | [M + H] <sup>+</sup><br>[M - H <sub>2</sub> O] <sup>+</sup>                                                        | 4.04        | C <sub>11</sub> H <sub>14</sub> O <sub>5</sub>  | - 0.9                      | 209.0807<br>163.0751<br>149.0596<br>105.0697                                                | Putatively<br>characterized<br>compound classes (III) |
| Dihydroxyhydrocinnamic acid                                   | 183.0650 (2)<br>184.0682 (27)<br>165.0544 (28)                                                    | [M + H] <sup>+</sup><br>[[M + H] <sup>+</sup> <sup>13</sup> C] <sup>+</sup><br>[M - H <sub>2</sub> O] <sup>+</sup> | 4.84        | C <sub>9</sub> H <sub>10</sub> O <sub>4</sub>   | - 1.0                      | 165.0544<br>137.0595                                                                        | HMDB ID:<br>HMDB0000423 (II)                          |
| 11-Deoxygenipic acid                                          | 169.0858 (15)<br>151.0752 (3)<br>107.0853 (10)                                                    | [M + H] <sup>+</sup><br>[M - H <sub>2</sub> O] <sup>+</sup><br>[M - CO <sub>2</sub> ] <sup>+</sup>                 | 3.89        | C <sub>9</sub> H <sub>12</sub> O <sub>3</sub>   | -1.0                       | 151.0752<br>107.0853                                                                        | Putatively<br>characterized<br>compound classes (III) |
| (1R,6R)-6-Hydroxy-2-succinylcyclohexa-2,4-diene-1-carboxylate | 241.0703 (45)<br>223.0598 (6)                                                                     | [M + H] <sup>+</sup><br>[M - H <sub>2</sub> O] <sup>+</sup>                                                        | 4.93        | C <sub>11</sub> H <sub>12</sub> O <sub>6</sub>  | - 1.3                      | 223.0598<br>209.0440<br>195.0643<br>177.0542<br>119.0489                                    | KEGG ID:<br>C05817 (III)                              |
| 3(4)-Dehydrogenipic acid                                      | 187.0962 (7)                                                                                      | [M + H] <sup>+</sup>                                                                                               | 3.87        | C <sub>9</sub> H <sub>14</sub> O <sub>4</sub>   | - 1.5                      | 169.0856<br>151.0751<br>107.0852                                                            | Putatively<br>characterized<br>compound classes (III) |
| 14-Deoxygenipinic acid                                        | 227.0912 (8)<br>210.0839 (32)<br>209.0807 (11)<br>163.0752 (31)<br>149.0596 (18)<br>135.0803 (30) | [M + H] <sup>+</sup><br>[M - H <sub>2</sub> O] <sup>+</sup>                                                        | 4.68        | C <sub>11</sub> H <sub>14</sub> O <sub>5</sub>  | - 0.7                      | 209.0807<br>191.0699<br>177.0543<br>163.0750<br>149.0595<br>135.0802<br>121.0646<br>93.0697 | Putatively<br>characterized<br>compound classes (III) |
| Genipic acid glucuronide                                      | 378.1394 (9)                                                                                      | [M + H] <sup>+</sup>                                                                                               | 4.79        | C <sub>15</sub> H <sub>20</sub> O <sub>10</sub> | 0.8                        | 185.0807<br>167.0698<br>139.0751<br>95.0853                                                 | (IV)                                                  |

**Table S2.** continued

| Annotated metabolite                                         | MS Main ions<br><i>m/z</i> ( <i>p</i> -value<br>classification) | Ion                                                                                     | RT<br>(min) | Proposed<br>precursor ion<br>formula           | Mass<br>precision<br>(ppm) | MS/MS ( <i>m/z</i> )<br>main fragments<br>(30-40 v)      | Reference/<br>identification level                    |
|--------------------------------------------------------------|-----------------------------------------------------------------|-----------------------------------------------------------------------------------------|-------------|------------------------------------------------|----------------------------|----------------------------------------------------------|-------------------------------------------------------|
| Unknown                                                      | 228.1229 (12)                                                   |                                                                                         | 4.84        |                                                |                            | 183.0649                                                 | (IV)                                                  |
| Dihydroxyhydrocinnamic acid<br>isomer                        | 183.0650 (29)<br>165.0544 (13)<br>137.0596 (25)                 | [M + H] <sup>+</sup><br>[M - H <sub>2</sub> O] <sup>+</sup><br>[M - HCOOH] <sup>+</sup> | 4.06        | C <sub>9</sub> H <sub>10</sub> O <sub>4</sub>  | - 0.8                      | 165.0544<br>137.0596                                     | HMDB ID:<br>HMDB0000423 (II)                          |
| CMPF (3-carboxy-4-methyl-5-<br>propyl-2-furanpropanoic acid) | 241.1068 (21)<br>223.0962 (17)                                  | [M + H] <sup>+</sup>                                                                    | 4.62        | C <sub>12</sub> H <sub>16</sub> O <sub>5</sub> | - 0.7                      | 223.0974<br>196.1692<br>181.0861                         | HMDB ID:<br>HMDB0061112 (II)                          |
| 11-Deoxygenipic acid isomer                                  | 169.0494 (19)                                                   | [M + H] <sup>+</sup>                                                                    | 4.15        | C <sub>8</sub> H <sub>8</sub> O <sub>4</sub>   | - 0.3                      | 151.0751<br>107.0852                                     | Putatively<br>characterized<br>compound classes (III) |
| Unknown                                                      | 225.0755 (20)                                                   |                                                                                         | 4.58        |                                                |                            | 207.0646<br>189.0543<br>161.0594<br>151.0388<br>119.0490 | (IV)                                                  |
| Dimethylphenol                                               | 123.0803 (22)                                                   | [M + H] <sup>+</sup>                                                                    | 3.91        | C <sub>8</sub> H <sub>10</sub> O               | -0.9                       | 105.0696<br>95.0853<br>81.0696<br>67.0540                | METLIN ID:<br>88228 (III)                             |
| Hydroxyhydrocinnamic acid                                    | 167.0700 (23)                                                   | [M + H] <sup>+</sup>                                                                    | 1.79        | C <sub>9</sub> H <sub>10</sub> O <sub>3</sub>  | -1.3                       | 149.0132<br>121.0644<br>107.0489                         | HMDB ID:<br>HMDB00375 (III)                           |
| Hydroxyphenyl-propanediol                                    | 169.0858 (24)                                                   | [M + H] <sup>+</sup>                                                                    | 4.77        | C <sub>9</sub> H <sub>12</sub> O <sub>3</sub>  | -0.7                       | 151.0751<br>123.0802<br>107.0852                         | METLIN ID:<br>984984 (II)                             |
| Unknown                                                      | 169.0494 (26)                                                   |                                                                                         | 3.49        |                                                |                            | 151.0751<br>124.0867<br>107.0853<br>100.0754<br>94.0285  | (IV)                                                  |

**Table S2.** continued

| Annotated metabolite | MS Main ions <i>m/z</i> ( <i>p</i> -value classification)       | Ion                                                                                                     | RT (min) | Proposed precursor ion formula                 | Mass precision (ppm) | MS/MS ( <i>m/z</i> ) main fragments (30-40 v)                       | Reference/ identification level                      |
|----------------------|-----------------------------------------------------------------|---------------------------------------------------------------------------------------------------------|----------|------------------------------------------------|----------------------|---------------------------------------------------------------------|------------------------------------------------------|
| Unknown              | 167.0702 (33)                                                   |                                                                                                         | 2.22     |                                                |                      | 149.0134<br>121.0646                                                | (IV)                                                 |
| Prephenic acid       | 227.0549 (40)<br>209.0443 (34)                                  | [M + H] <sup>+</sup><br>[M - H <sub>2</sub> O] <sup>+</sup>                                             | 1.82     | C <sub>10</sub> H <sub>10</sub> O <sub>6</sub> | -0.8                 | 209.0442<br>191.0334<br>163.0386<br>137.0596<br>135.0438            | HMDB ID:<br>HMDB0012283 (III)                        |
| Unknown              | 197.0806 (35)                                                   |                                                                                                         | 5.32     |                                                |                      | 190.9925<br>141.0002                                                | (IV)                                                 |
| Scopoletin           | 193.0494 (36)                                                   | [M + H] <sup>+</sup>                                                                                    | 5.87     | C <sub>10</sub> H <sub>8</sub> O <sub>4</sub>  | - 0.6                | 175.1471<br>147.0437                                                | HMDB ID:<br>HMDB0034344 (II)                         |
| Genipic acid         | 185.0808 (37)<br>186.0840 (44)<br>139.0753 (41)<br>95.0853 (47) | [M + H] <sup>+</sup><br>[[M + H] <sup>+</sup> <sup>13</sup> C] <sup>+</sup><br>[M - HCOOH] <sup>+</sup> | 5.38     | C <sub>9</sub> H <sub>12</sub> O <sub>4</sub>  | -0.0                 | 167.0700<br>139.0753<br>95.0853                                     | METLIN ID:<br>91245<br>HMDB ID:<br>HMDB0036072 (III) |
| Isoscooletin         | 193.0494 (38)                                                   | [M + H] <sup>+</sup>                                                                                    | 5.28     | C <sub>10</sub> H <sub>8</sub> O <sub>4</sub>  | - 0.6                | 175.0387<br>147.0439                                                | KEGG ID:<br>C18079 (III)                             |
| Unknown              | 137.0597 (39)                                                   |                                                                                                         | 4.82     |                                                |                      |                                                                     | (IV)                                                 |
| Unknown              | 209.0807 (42)                                                   |                                                                                                         | 5.32     |                                                |                      | 177.0544<br>149.0595<br>141.0002<br>131.0490<br>105.0696            | (IV)                                                 |
| Unknown              | 199.0964 (43)                                                   |                                                                                                         | 5.58     |                                                |                      | 169.9770<br>135.0802                                                | (IV)                                                 |
| Unknown              | 155.0701 (46)                                                   |                                                                                                         | 2.60     |                                                |                      | 137.0594<br>153.0907<br>135.0805<br>125.0595<br>107.0853<br>89.0707 | (IV)                                                 |
| Unknown              | 171.1013 (48)                                                   |                                                                                                         | 4.31     |                                                |                      | 153.0907<br>125.0595                                                | (IV)                                                 |

**Table S2.** continued

| Annotated metabolite | MS Main ions $m/z$ ( $p$ -value classification) | Ion | RT (min) | Proposed precursor ion formula | Mass precision (ppm) | MS/MS ( $m/z$ ) main fragments (30-40 v) | Reference/ identification level |
|----------------------|-------------------------------------------------|-----|----------|--------------------------------|----------------------|------------------------------------------|---------------------------------|
| Unknown              | 373.1489 (49)                                   |     | 5.72     |                                |                      | 197.1164<br>179.1062                     | (IV)                            |
| Unknown              | 292.1571 (50)                                   |     | 5.73     |                                |                      | 233.0837<br>103.0573                     | (IV)                            |

Levels of metabolite identifications: I, Identified compounds; II, Putatively annotated compounds; III, Putatively characterized compound classes; IV, Unknown compounds.

**Table S3.** 50 (P-value < 0.05) most discriminant features in negative mode.

| Annotated metabolite                    | MS Main ions<br><i>m/z</i> ( <i>p</i> -value<br>classification) | Ion                                                                                                              | RT<br>(min) | Proposed<br>precursor ion<br>formula           | Mass<br>precision<br>(ppm) | MS/MS ( <i>m/z</i> ) main<br>fragments (30-40<br>v)                             | Reference/<br>identification level                    |
|-----------------------------------------|-----------------------------------------------------------------|------------------------------------------------------------------------------------------------------------------|-------------|------------------------------------------------|----------------------------|---------------------------------------------------------------------------------|-------------------------------------------------------|
| 12-Demethylated-8-hydroxygenipinic acid | 243.0510 (7)<br>244.0545 (13)<br>199.0613 (9)<br>155.0714 (1)   | [M - H] <sup>-</sup><br>[[M-H] <sup>+</sup> <sup>13</sup> C] <sup>-</sup><br>[M - CO <sub>2</sub> ] <sup>-</sup> | 1.82        | C <sub>10</sub> H <sub>12</sub> O <sub>7</sub> | 0.0                        | 199.0613<br>155.0714<br>137.0607                                                | Putatively<br>characterized<br>compound classes (III) |
| Unknown                                 | 229.0718 (2)                                                    |                                                                                                                  | 3.13        |                                                |                            | 211.0611<br>185.0818<br>150.0559                                                | (IV)                                                  |
| 3(7)-Dehydrogenipinic acid              | 243.0874 (3)<br>225.0770 (25)                                   | [M-H] <sup>-</sup><br>[M - H <sub>2</sub> O] <sup>-</sup>                                                        | 4.05        | C <sub>11</sub> H <sub>16</sub> O <sub>6</sub> | -0.2                       | 225.0767<br>149.0606<br>137.0607                                                | Putatively<br>characterized<br>compound classes (III) |
| 3(4)-Dehydrogenipinic acid              | 185.0819 (4)                                                    | [M-H] <sup>-</sup>                                                                                               | 3.89        | C <sub>9</sub> H <sub>14</sub> O <sub>4</sub>  | 0.3                        | 167.0712<br>155.0713<br>141.0920<br>123.0815<br>93.0708                         | Putatively<br>characterized<br>compound classes (III) |
| 3(7)-Dehydrogenipinic acid isomer       | 243.0874 (5)                                                    | [M-H] <sup>-</sup>                                                                                               | 4.67        | C <sub>11</sub> H <sub>16</sub> O <sub>6</sub> | 0.1                        | 225.0767<br>213.0767<br>169.0869<br>149.0606<br>137.0607                        | Putatively<br>characterized<br>compound classes (III) |
| 8-Hydroxygenipinic acid                 | 199.0614 (6)                                                    | [M-H] <sup>-</sup>                                                                                               | 4.05        | C <sub>9</sub> H <sub>12</sub> O <sub>5</sub>  | 1.4                        | 181.0505<br>155.0712<br>153.0553<br>137.0606<br>125.0607<br>111.0815<br>93.0709 | Putatively<br>characterized<br>compound classes (III) |
| Unknown                                 | 213.0770 (8)                                                    |                                                                                                                  | 3.91        |                                                |                            | 181.0506<br>137.0607<br>119.0500<br>95.0502<br>73.0294                          | (IV)                                                  |

**Table S3.** continued

| Annotated metabolite                             | MS Main ions<br><i>m/z</i> ( <i>p</i> -value<br>classification) | Ion                | RT<br>(min) | Proposed<br>precursor ion<br>formula          | Mass<br>precision<br>(ppm) | MS/MS ( <i>m/z</i> )<br>main fragments<br>(30-40 v)      | Reference/ identification<br>level                 |
|--------------------------------------------------|-----------------------------------------------------------------|--------------------|-------------|-----------------------------------------------|----------------------------|----------------------------------------------------------|----------------------------------------------------|
| Unknown                                          | 185.0456 (10)                                                   |                    | 3.50        |                                               |                            | 167.0348<br>141.0557<br>125.0969<br>123.0815<br>97.06583 | (IV)                                               |
| Unknown                                          | 186.0853 (11)                                                   |                    | 3.88        |                                               |                            | 168.0747<br>143.0713<br>124.0848<br>94.0742              | (IV)                                               |
| Unknown                                          | 227.0563 (12)                                                   |                    | 2.60        |                                               |                            | 210.0881<br>183.0661<br>165.0555<br>121.0657             | (IV)                                               |
| Unknown                                          | 213.0771 (14)                                                   |                    | 4.34        |                                               |                            | 183.0662<br>137.0607<br>73.0294                          | (IV)                                               |
| Genipic acid                                     | 183.0664 (15)                                                   | [M-H] <sup>-</sup> | 5.39        | C <sub>9</sub> H <sub>12</sub> O <sub>4</sub> | 0.9                        | 168.0060<br>155.0348<br>139.0763                         | HMDB ID:<br>HMDB0036072 (III)                      |
| Hydroxymethyl-<br>cyclopenta[c]furan-<br>1,3diol | 171.0664 (16)                                                   | [M-H] <sup>-</sup> | 2.59        | C <sub>8</sub> H <sub>12</sub> O <sub>4</sub> | 0.8                        | 153.0555<br>142.9464<br>109.0657<br>79.0552              | Putatively characterized<br>compound classes (III) |
| Unknown                                          | 345.1191 (17)                                                   |                    | 5.08        |                                               |                            | 327.1081<br>285.0978<br>113.0243<br>75.0086              | (IV)                                               |
| Unknown                                          | 197.0820 (18)                                                   |                    | 6.61        |                                               |                            | 179.0713<br>153.092                                      | (IV)                                               |
| Unknown                                          | 211.0614 (19)                                                   |                    | 4.23        |                                               |                            | 193.0496<br>181.0507<br>167.0713<br>151.0399             | (IV)                                               |

**Table S3.** continued

| Annotated metabolite | MS Main ions <i>m/z</i> ( <i>p</i> -value classification) | Ion                | RT (min) | Proposed precursor ion formula                | Mass precision (ppm) | MS/MS ( <i>m/z</i> ) main fragments (30-40 v)                                                          | Reference/ identification level |
|----------------------|-----------------------------------------------------------|--------------------|----------|-----------------------------------------------|----------------------|--------------------------------------------------------------------------------------------------------|---------------------------------|
| Unknown              | 359.0986 (20)                                             |                    | 4.79     |                                               |                      | 183.0662<br>175.0248<br>155.0350<br>139.0764<br>113.0244                                               | (IV)                            |
| Unknown              | 213.0772 (21)                                             |                    | 4.94     |                                               |                      | 133.0489<br>79.9573                                                                                    | (IV)                            |
| Unknown              | 213.0770 (22)                                             |                    | 5.31     |                                               |                      | 195.0665<br>181.0505<br>169.0869<br>151.0764<br>137.0607<br>125.0971<br>119.0502<br>95.0502<br>73.0294 | (IV)                            |
| Nonate               | 187.0977 (23)                                             | [M-H] <sup>-</sup> | 4.31     | C <sub>9</sub> H <sub>16</sub> O <sub>4</sub> | 1.1                  | 169.0869<br>141.0920<br>125.0972                                                                       | METLIN ID:<br>44183 (II)        |
| Unknown              | 201.0771 (24)                                             |                    | 4.42     |                                               | 1.4                  | 183.0663<br>157.0869<br>139.0763                                                                       | (IV)                            |
| Unknown              | 257.1033 (26)                                             |                    | 5.51     |                                               |                      | 221.8424<br>213.1132<br>195.1024                                                                       | (IV)                            |
| Hydroxymandelic acid | 167.0351 (27)                                             | [M-H] <sup>-</sup> | 4.81     | C <sub>8</sub> H <sub>8</sub> O <sub>4</sub>  | 0.7                  | 123.0450<br>121.0293                                                                                   | HMDB ID:<br>HMDB0000822 (III)   |
| Unknown              | 227.0928 (28)                                             |                    | 5.56     |                                               |                      | 209.1151<br>183.1026                                                                                   | (IV)                            |
| Unknown              | 213.0405 (29)                                             |                    | 4.21     |                                               |                      | 137.0608<br>125.0607<br>73.0294                                                                        | (IV)                            |
| Genipic acid isomer  | 183.0663 (30)                                             | [M-H] <sup>-</sup> | 6.39     | C <sub>9</sub> H <sub>12</sub> O <sub>4</sub> | 0.5                  | 169.0010<br>139.0761<br>112.9855                                                                       | HMDB ID:<br>HMDB0036072 (III)   |



**Table S3.** continued

| Annotated metabolite         | MS Main ions<br><i>m/z</i> ( <i>p</i> -value<br>classification) | Ion                | RT<br>(min) | Proposed<br>precursor<br>ion<br>formula       | Mass<br>precision<br>(ppm) | MS/MS<br>( <i>m/z</i> )<br>main<br>fragments<br>(30-40 v) | Reference/ identification<br>level |
|------------------------------|-----------------------------------------------------------------|--------------------|-------------|-----------------------------------------------|----------------------------|-----------------------------------------------------------|------------------------------------|
| Unknown                      | 217.1083 (31)                                                   |                    | 4.74        |                                               |                            | 199.0977<br>137.0243<br>93.0345<br>79.9572                | (IV)                               |
| 3-Hydroxy-4-methoxymandelate | 197.0456 (32)                                                   | [M-H] <sup>-</sup> | 1.70        | C <sub>9</sub> H <sub>10</sub> O <sub>5</sub> | 0.4                        | 179.0350<br>169.0506<br>125.0242                          | HMDB ID:<br>HMDB0029170 (III)      |
| Unknown                      | 123.0451 (33)                                                   |                    | 4.83        |                                               |                            | 108.0215<br>95.0138<br>79.0552                            | (IV)                               |
| 2-isopropylmalic acid        | 175.0613 (34)                                                   | [M-H] <sup>-</sup> | 4.87        | C <sub>7</sub> H <sub>12</sub> O <sub>5</sub> | 0.9                        | 157.0505<br>115.0399<br>85.0658                           | Identified compounds (I)           |
| Unknown                      | 256.9763 (35)                                                   |                    | 4.86        |                                               |                            | 177.0192<br>137.0606<br>73.0295                           | (IV)                               |
| Unknown                      | 457.1027 (36)                                                   |                    | 6.31        |                                               |                            | 175.0248<br>145.0618<br>113.0244<br>96.9600               | (IV)                               |
| Unknown                      | 124.0074 (37)                                                   |                    | 0.55        |                                               |                            | 106.9807<br>94.9807<br>79.9573                            | (IV)                               |
| Unknown                      | 217.1083 (38)                                                   |                    | 4.31        |                                               |                            | 199.0974<br>137.0970<br>97.0657                           | (IV)                               |
| Unknown                      | 401.1821 (39)                                                   |                    | 5.72        |                                               |                            | 383.1702<br>341.1605<br>207.1390                          | (IV)                               |
| 2,3-dihydroxybenzoate        | 153.0195 (40)                                                   | [M-H] <sup>-</sup> | 4.59        | C <sub>7</sub> H <sub>6</sub> O <sub>4</sub>  | 1.0                        | 137.0352<br>123.0090<br>109.0293                          | Identified compound (I)            |

**Table S3.** continued

| Annotated metabolite                | MS Main ions<br><i>m/z</i> ( <i>p</i> -value<br>classification) | Ion                | RT<br>(min) | Proposed<br>precursor<br>ion<br>formula         | Mass<br>precision<br>(ppm) | MS/MS<br>( <i>m/z</i> )<br>main<br>fragments<br>(30-40 v) | Reference/ identification<br>level |
|-------------------------------------|-----------------------------------------------------------------|--------------------|-------------|-------------------------------------------------|----------------------------|-----------------------------------------------------------|------------------------------------|
| Unknown                             | 371.1346 (41)                                                   |                    | 5.72        |                                                 |                            | 353.1236<br>311.1132<br>177.0920                          | (IV)                               |
| 3,4-Methylene suberic acid          | 197.0820 (42)                                                   | [M-H] <sup>-</sup> | 6.76        | C <sub>10</sub> H <sub>14</sub> O <sub>4</sub>  | 0.8                        | 179.0721<br>153.0920<br>135.0815<br>59.0137               | HMDB ID:<br>HMDB59768 (III)        |
| Unknown                             | 215.0021 (43)                                                   |                    | 5.04        |                                                 |                            | 178.0510<br>153.0920<br>135.0450                          | (IV)                               |
| cis-4-Decenedioic acid              | 199.0977 (44)                                                   | [M-H] <sup>-</sup> | 6.95        | C <sub>10</sub> H <sub>16</sub> O <sub>4</sub>  | 1.0                        | 197.0974<br>181.0869<br>155.1077<br>137.0971              | HMDB ID:<br>HMDB0000603 (III)      |
| Unknown                             | 211.0614 (45)                                                   |                    | 4.75        |                                                 |                            | 146.0250<br>132.0453<br>80.9650                           | (IV)                               |
| Unknown                             | 153.0921 (46)                                                   |                    | 6.74        |                                                 |                            | 135.0815<br>124.0164<br>109.0294<br>59.0138               | (IV)                               |
| Unknown                             | 133.0507 (47)                                                   |                    | 1.72        |                                                 |                            | 115.0397<br>87.0086<br>71.0137                            | (IV)                               |
| Unknown                             | 249.0076 (48)                                                   |                    | 3.52        |                                                 |                            | 169.0141<br>121.0329                                      | (IV)                               |
| 3,4-Dihydroxyphenylglycol O-sulfate | 249.0076 (49)                                                   | [M-H] <sup>-</sup> | 4.01        | C <sub>8</sub> H <sub>10</sub> O <sub>7</sub> S | 0.6                        | 169.0506<br>151.0395<br>139.0035                          | HMDB ID:<br>HMDB0001474 (III)      |

**Table S3.** continued

| Annotated metabolite | MS Main ions<br><i>m/z</i> ( <i>p</i> -value<br>classification) | Ion | RT<br>(min) | Proposed<br>precursor<br>ion<br>formula | Mass<br>precision<br>(ppm) | MS/MS<br>( <i>m/z</i> )<br>main<br>fragments<br>(30-40 v) | Reference/ identification<br>level |
|----------------------|-----------------------------------------------------------------|-----|-------------|-----------------------------------------|----------------------------|-----------------------------------------------------------|------------------------------------|
| Unknown              | 377.1454 (50)                                                   |     | 6.58        |                                         |                            | 377.1456<br>183.1026<br>201.1132<br>113.0244              | (IV)                               |

Levels of metabolite identifications: I, Identified compounds; II, Putatively annotated compounds; III, Putatively characterized compound classes; IV, Unknown compounds.

**Figure S1:** Common and more specific biomarker of genipap consumption at each time-range. The intersection indicates the steadiest biomarkers across each time-range. Multiplex Pred indicates the predictive multiplex biomarker.

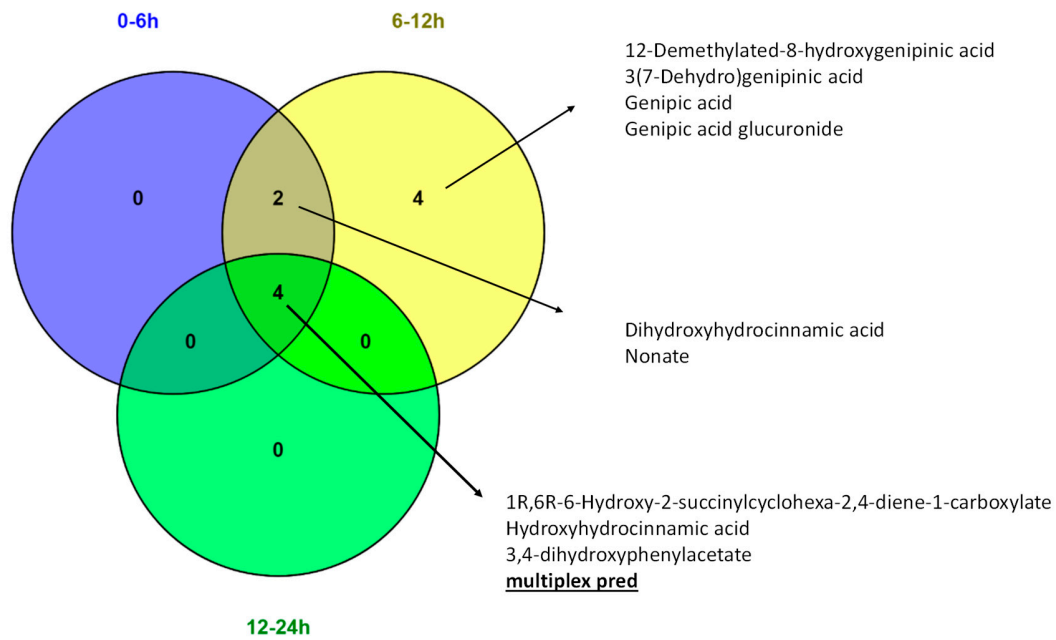

**Figure S2:** Genipap consumers' vs non-consumers' prediction using the urine multiplex biomarkers measured at 0-6h, 6-12h and 12-24h. The cut off values indicating genipap consumption status were permuted to assess the impact of the sampling time on the prediction over 24h. The actual cut off values of each time-range are indicated in red. Misclassified samples are indicated with an arrow.

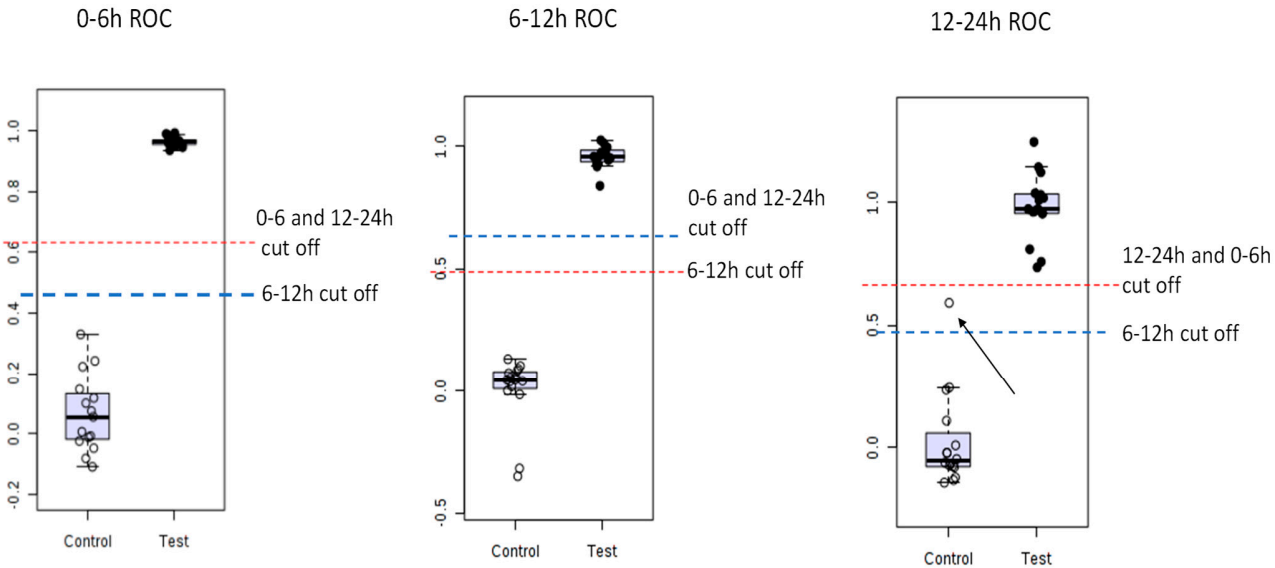

**Figure S3:** Interindividual variation of best predicting metabolites (ROC AUC of 1, Table 2) at 0-6h (A), 6-12h (B), and 12-24h (C) urine compared to the multiplex biomarker scores (yellow line) calculated over the same time ranges. All values are scaled to 1 to ease comparisons.

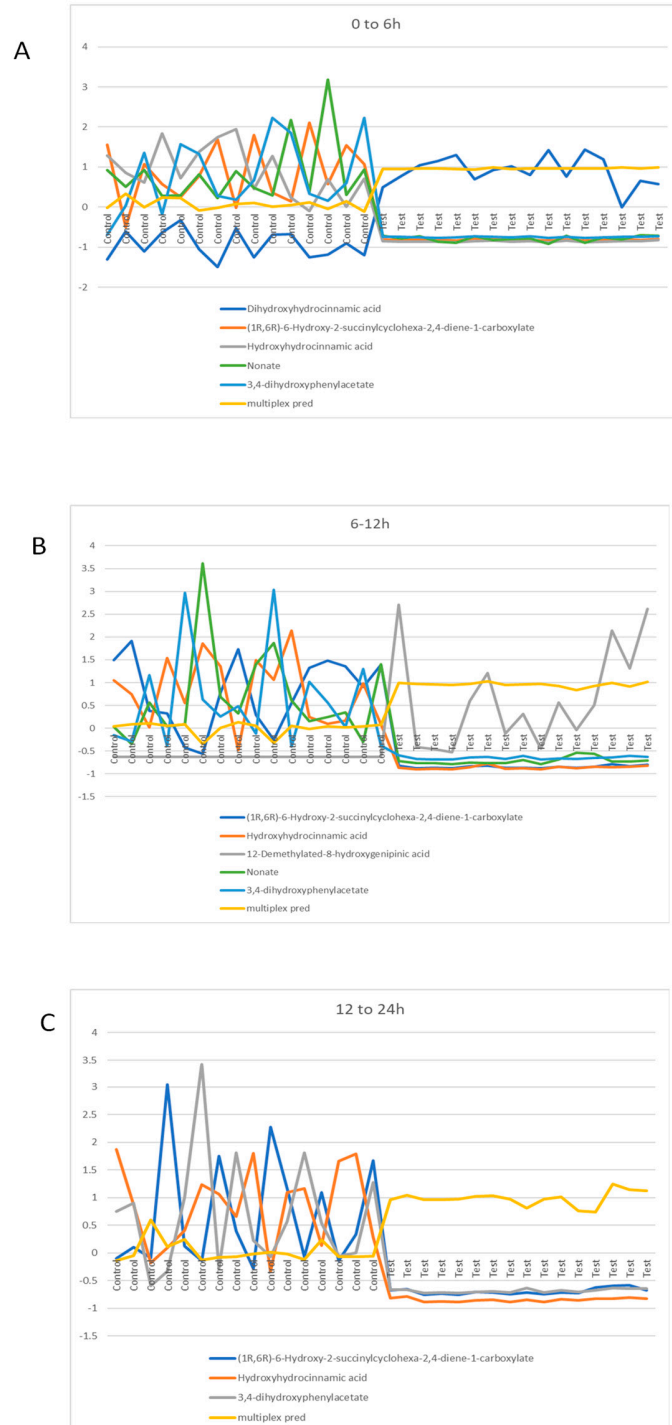

**Figure S4:** MS/MS spectra fragmentation. (A) spectrum of commercial standard of genipin, (B) spectra of a metabolite obtained from human urine sample after drink genipap juice ( $[M + H]^+$ ,  $m/z$  227.0911, retention time: 4.04).

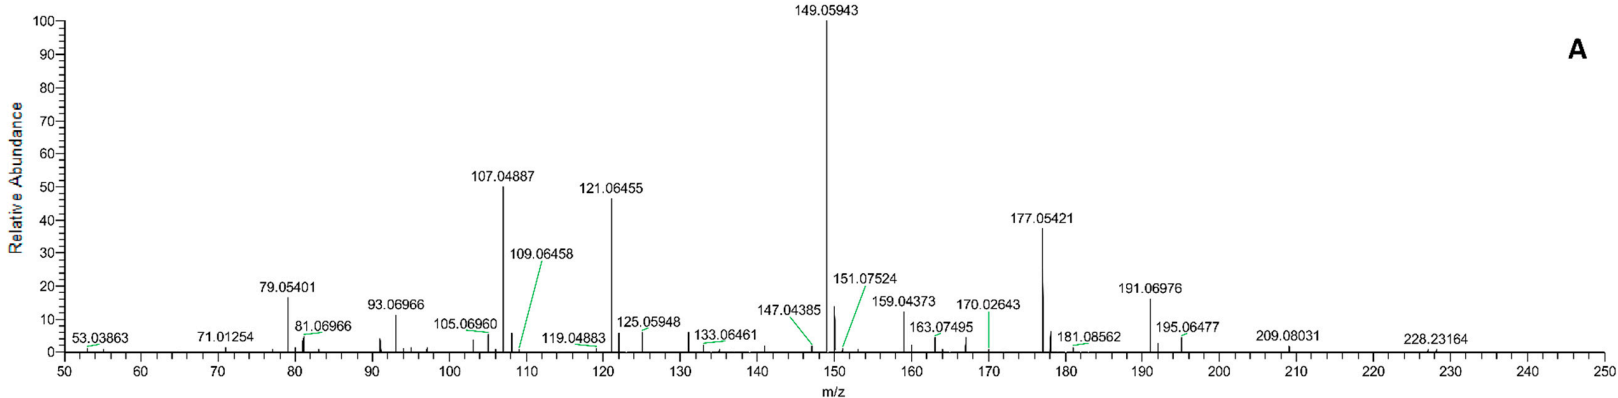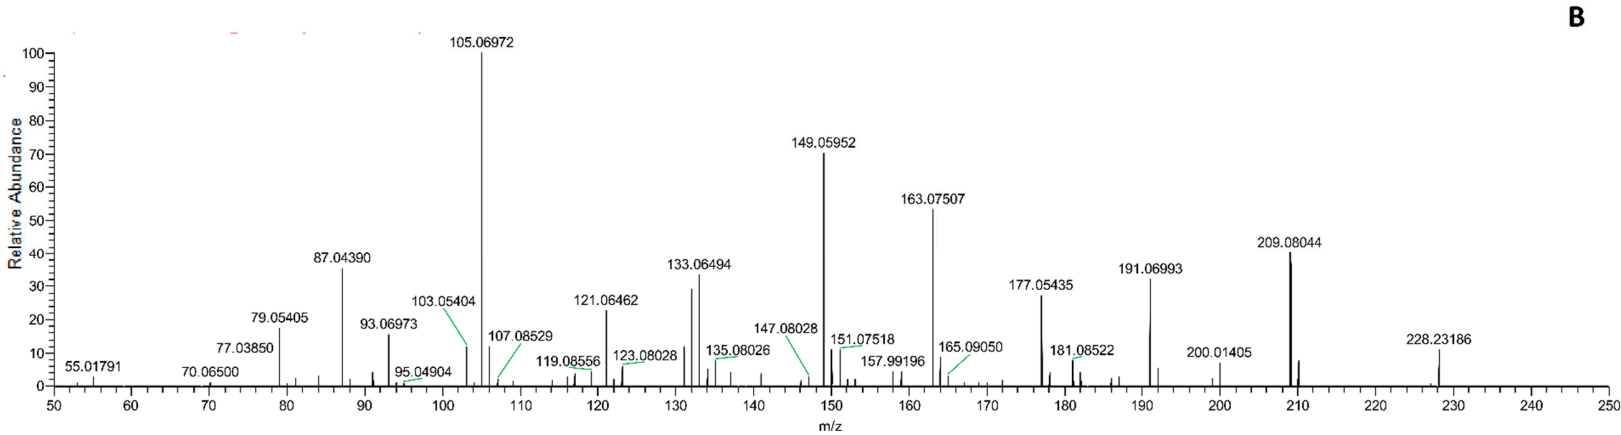

Supplement: nutrients-10-01155-s001.pdf [file nutrients-10-01155-s001.pdf]
